# Supplementary material for: Cross Talk between ARF1 and RhoA Coordinates the Formation of Cytoskeletal Scaffolds during Chlamydia Infection
Source: PubMed Central journal article supplement (PMC8669492; doi:10.1128/mbio.02397-21), 2021-12-14

**A**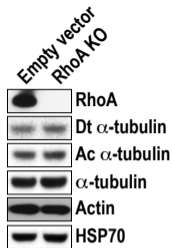**B**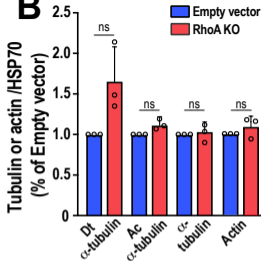**C**

RhoA CRISPR/Cas9  
KO Cell line

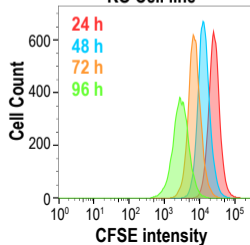**D**

Empty Cas9 vector  
control cell line

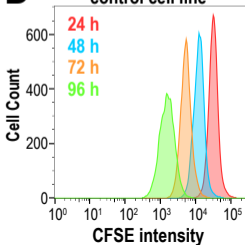

Supplement: mbio.02397-21-sf001.pdf [file mbio.02397-21-sf001.pdf]
