# Supplementary material for: Cross Talk between ARF1 and RhoA Coordinates the Formation of Cytoskeletal Scaffolds during Chlamydia Infection
Source: PubMed Central journal article supplement (PMC8669492; doi:10.1128/mbio.02397-21), 2021-12-14
Supplement: mbio.02397-21-sf006.pdf [file mbio.02397-21-sf006.pdf]

Not infected

L2-infected

8 16 24 32 40 48

8 16 24 32 40 48

hpi

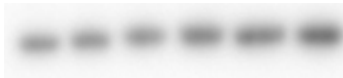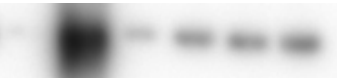

**ARF1 GTP**

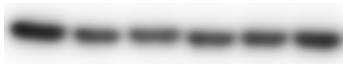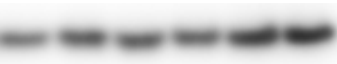

**Total ARF1**
